# Supplementary material
Source: PubMed Central journal article supplement (PMC9788856)
Supplement: NIHMS1859057-supplement-Supplementary_material.pdf [file NIHMS1859057-supplement-Supplementary_material.pdf]

# Supplementary Material

## Plasma Sphingomyelins in Late-Onset Alzheimer's Disease

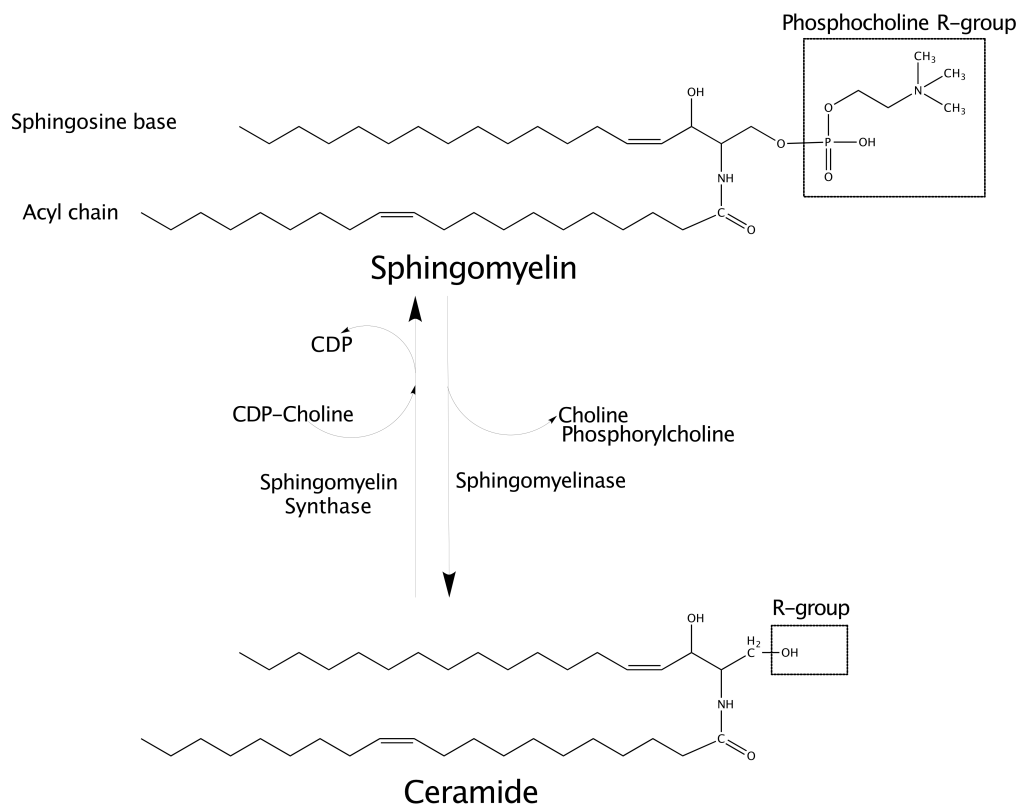

**Supplementary Figure 1.** Synthesis and structure of sphingomyelin species. Addition of a choline group to ceramide by sphingomyelin synthase produces a sphingomyelin. Removal of that group from SM is facilitated by sphingomyelinase. The length, saturation, and hydroxylation status of the acyl chain generates structural variability between SM species.

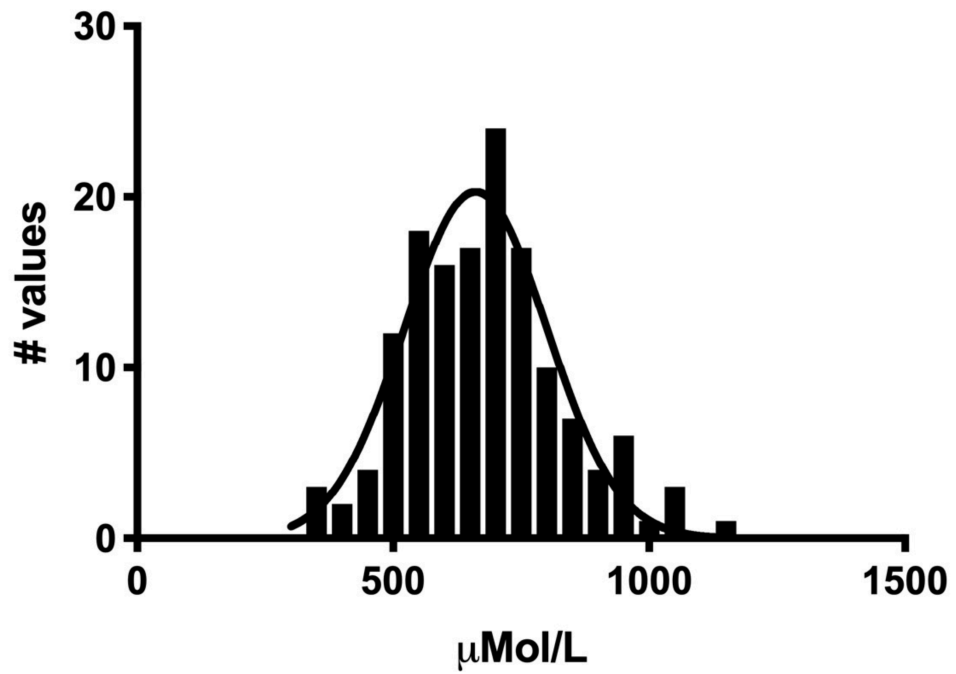

**Supplementary Figure 2.** Histogram of total SM, the sum of all measured plasma SM levels.

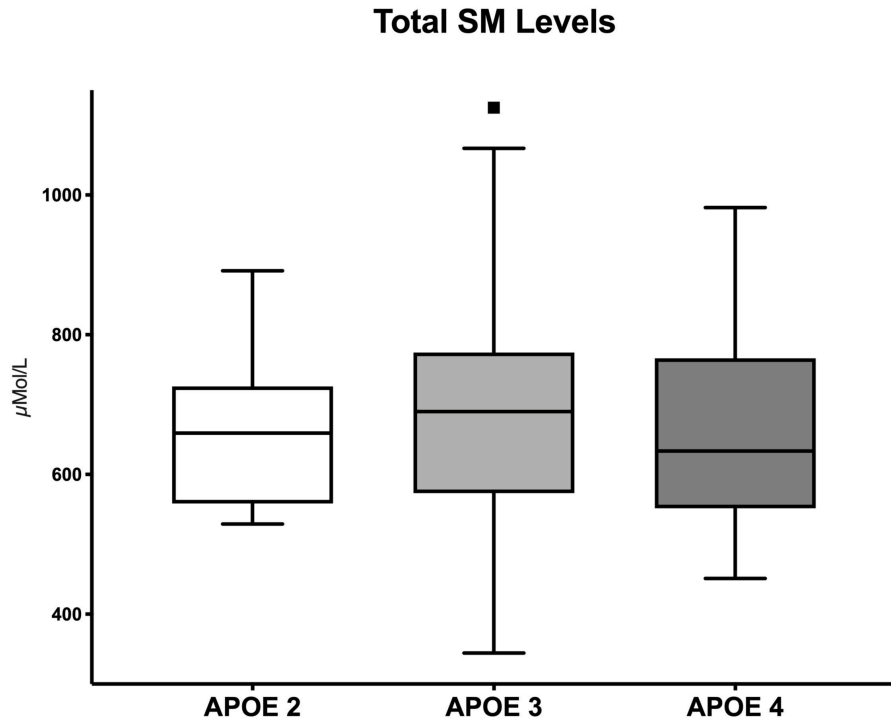

**Supplementary Figure 3.** Total plasma SM levels in  $\mu\text{Mol/L}$  separated by *APOE* status. Individuals carrying at least one copy of *APOE 2* or *APOE 4* were grouped together respectively, while *APOE 3* represents carriers of two copies of *APOE 3*. Includes individuals in all three disease states. Box plot center line represents mean, upper and lower bounds and whiskers generated by Tukey method; outliers plotted as points beyond whiskers.

**Supplementary Table 1.** Literature review of sphingolipid dysregulation in AD. Increase in sphingolipid or enzyme levels or activity is indicated in pink, whereas decreases in levels or activity are indicated in blue. Where results were equivocal in direction, cell is not colored and explanation is found in the notes column.

| First Author     | Date | Sphingolipid | Subjects | Tissue    | Notes                                                                                                     |
|------------------|------|--------------|----------|-----------|-----------------------------------------------------------------------------------------------------------|
| Li et al.        | 2019 | SM           | Human    | Plasma    | High SMs association with higher total brain volume on MRI                                                |
| Li et al.        | 2017 | SM           | Human    | Plasma    | Prospective association of high SM with dementia in African Americans                                     |
| Mielke et al.    | 2017 | SM           | Human    | Plasma    | High SM in men increases risk of AD, whereas high SM in women decreases risk of AD                        |
| Mielke et al.    | 2011 | SM           | Human    | Plasma    |                                                                                                           |
| Han et al.       | 2011 | SM           | Human    | Plasma    | Early AD metabolomics                                                                                     |
| Oberacher et al. | 2017 | SM           | Human    | Platelets | SM(OH)C14:1 is part of lipidomic model to differentiate normal control from MCI patients                  |
| Torretta et al.  | 2018 | SM           | Human    | Serum     |                                                                                                           |
| Toledo et al.    | 2017 | SM           | Human    | Serum     | Risk of conversion from MCI to AD positively associated with SMOH C 14:1 and SM C16:0                     |
| Oresic et al.    | 2011 | SM           | Human    | Serum     |                                                                                                           |
| Torretta et al.  | 2018 | SM           | Human    | CSF       | SM C24:1                                                                                                  |
| Koal et al.      | 2015 | SM           | Human    | CSF       |                                                                                                           |
| Fonteh et al.    | 2015 | SM           | Human    | CSF       |                                                                                                           |
| Mielke et al.    | 2014 | SM           | Human    | CSF       |                                                                                                           |
| Kosicek et al.   | 2012 | SM           | Human    | CSF       | Levels correlate with amyloid and tau                                                                     |
| Varma et al.     | 2018 | SM           | Human    | Brain     | Increased risk of conversion to incident AD associated with: SM C 16:0, SMC 16:1, SM OH C 14:1, SM C 18:1 |
| Diaz et al.      | 2015 | SM           | Human    | Brain     | More highly saturated in lipid rafts in cortex and cerebellum                                             |
| Chan et al.      | 2012 | SM           | Human    | Brain     |                                                                                                           |
| He et al.        | 2010 | SM           | Human    | Brain     |                                                                                                           |
| Bandaru et al.   | 2009 | SM           | Human    | Brain     | In grey matter of <i>APOE4</i> AD verses <i>APOE3</i> AD                                                  |
| Soderberg et al. | 1992 | SM           | Human    | Brain     |                                                                                                           |
| Bandaru et al.   | 2009 | SM           | Human    | Brain     | Grey mater                                                                                                |
| Pettegrew et al. | 2001 | SM           | Human    | Brain     |                                                                                                           |
| Lin et al.       | 2017 | SM           | Rat      | Plasma    | Metabolomics identified sphingolipid metabolism as dysregulated, SM 18:1/24:1 and SM 18:0/2:0 decreased   |
| Tajima et al.    | 2013 | SM           | Mouse    | Plasma    |                                                                                                           |

|                           |      |             |       |        |                                                                                                           |
|---------------------------|------|-------------|-------|--------|-----------------------------------------------------------------------------------------------------------|
| Tajima et al.             | 2013 | SM          | Mouse | Brain  |                                                                                                           |
| Gonzalez-Dominguez et al. | 2014 | SM          | Mouse | Brain  | Saturated SMs increase in hippocampus, unsaturated decreased in cortex, long chain SMs decreased          |
| Fabelo et al.             | 2012 | SM          | Mouse | Brain  | Within lipid rafts                                                                                        |
| Kim et al.                | 2018 | Cer         | Human | Plasma | Lipid species found in plasma HDL and LDL/VLDL                                                            |
| Kim et al.                | 2017 | Cer         | Human | Plasma |                                                                                                           |
| Mielke et al.             | 2017 | Cer         | Human | Plasma | High Cer increases AD risk in men                                                                         |
| Mielke et al.             | 2011 | Cer         | Human | Plasma | Not significant but higher trended towards disease progression                                            |
| Han et al.                | 2011 | Cer         | Human | Plasma |                                                                                                           |
| Mielke et al.             | 2010 | Cer         | Human | Plasma | Ceramides decreased in MCI versus NC, but in MCI group higher Cers were predictive of cognitive decline   |
| Torretta et al.           | 2018 | Cer         | Human | Serum  |                                                                                                           |
| Mielke et al.             | 2012 | Cer         | Human | Serum  | Increased serum ceramides increases risk of AD in women                                                   |
| Fonteh et al.             | 2015 | Cer         | Human | CSF    | Increased in prodromal disease, decreased with memory impairment                                          |
| de Wit et al.             | 2017 | Cer         | Human | Brain  | Cer increased in astrocytes in AD with capillary cerebral amyloid angiopathy compared to AD brain         |
| Filippov et al.           | 2012 | Cer         | Human | Brain  |                                                                                                           |
| He et al.                 | 2010 | Cer         | Human | Brain  |                                                                                                           |
| Bandaru et al.            | 2009 | Cer         | Human | Brain  | White matter                                                                                              |
| Bandaru et al.            | 2009 | Cer         | Human | Brain  | In grey matter of <i>APOE4</i> AD versus <i>APOE3</i> AD                                                  |
| Cutler                    | 2004 | Cer         | Human | Brain  | Advanced AD                                                                                               |
| Han et al.                | 2002 | Cer         | Human | Brain  | Cers elevated early in AD, decline in late stages of AD                                                   |
| den Hoedt                 | 2017 | Cer         | Mouse | Brain  | In transgenic human <i>APOE4</i> mice, compared to WT                                                     |
| Fonteh et al.             | 2015 | aSMase      | Human | CSF    |                                                                                                           |
| de Wit et al.             | 2017 | aSMase      | Human | Brain  | aSMase increased in microglia in AD brain with capillary cerebral amyloid angiopathy compared to AD brain |
| He et al.                 | 2010 | aSMase      | Human | Brain  |                                                                                                           |
| Lee et al.                | 2014 | aSMase      | Mouse | Blood  |                                                                                                           |
| Lee et al.                | 2014 | aSMase      | Mouse | Brain  |                                                                                                           |
| Lu et al.                 | 2019 | SM synthase | Mouse | Brain  | Inhibition of SM synthase 1 ameliorates A $\beta$ in mouse                                                |
| Hsiao et al.              | 2013 | SM synthase | Human | Brain  | Elevated SM synthase activity increases A $\beta$                                                         |
| Lin et al.                | 2017 |             | Rat   | Brain  | Metabolomics identified sphingolipid metabolism as dysregulated                                           |

**Supplementary Table 2.** Frequency of *APOE* genotypes in each disease state. Percentage of each genotype overall is in farthest right column, and percentage within each group in parentheses.

| <i>APOE</i> Genotype Frequency |                       |                      |               |            |
|--------------------------------|-----------------------|----------------------|---------------|------------|
| <i>APOE</i>                    | Normal Control (n=71) | Pre-converter (n=28) | MCI/AD (n=46) | % of Total |
| 2/2                            | 1 (1.4%)              | 0                    | 1 (2.2%)      | 1.38       |
| 2/3                            | 0                     | 0                    | 4 (8.7%)      | 2.76       |
| 3/3                            | 42 (59%)              | 23 (82%)             | 21 (46%)      | 59.31      |
| 3/4                            | 16 (23%)              | 5 (18%)              | 18 (39%)      | 26.90      |
| 4/4                            | 1 (1.4%)              | 0                    | 0             | 1.38       |
| 2/4                            | 1 (1.4%)              | 0                    | 1 (2.2%)      | 1.38       |
